# Supplementary material for: Atomic scale investigation of enhanced ferroelectricity in (Ba,Ca)TiO3
Source: Royal Society of Chemistry journal article supplement (doi:10.1039/c7ra00662d), 2017-01-01
Supplement: c7ra00662d1.pdf [file c7ra00662d1.pdf]

Supporting information for

## Atomic scale investigation of enhanced ferroelectricity in (Ba,Ca)TiO<sub>3</sub>

Xiao Na Zhu, Xing Chen, He Tian<sup>†</sup>, Xiang Ming Chen<sup>†</sup>

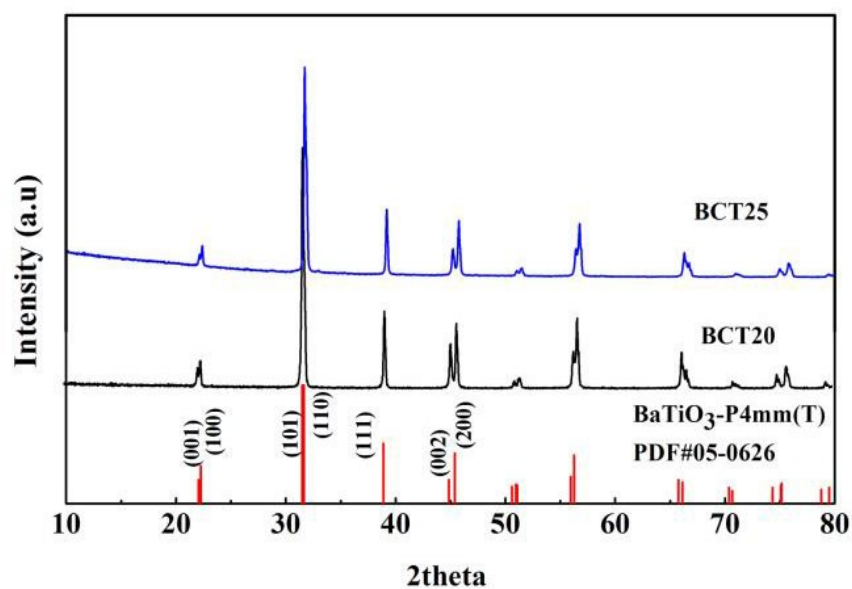

Figure S1, XRD pattern of  $x=0.2$ ,  $x=0.25$  and phase diagram of (Ba,Ca)TiO<sub>3</sub> system.

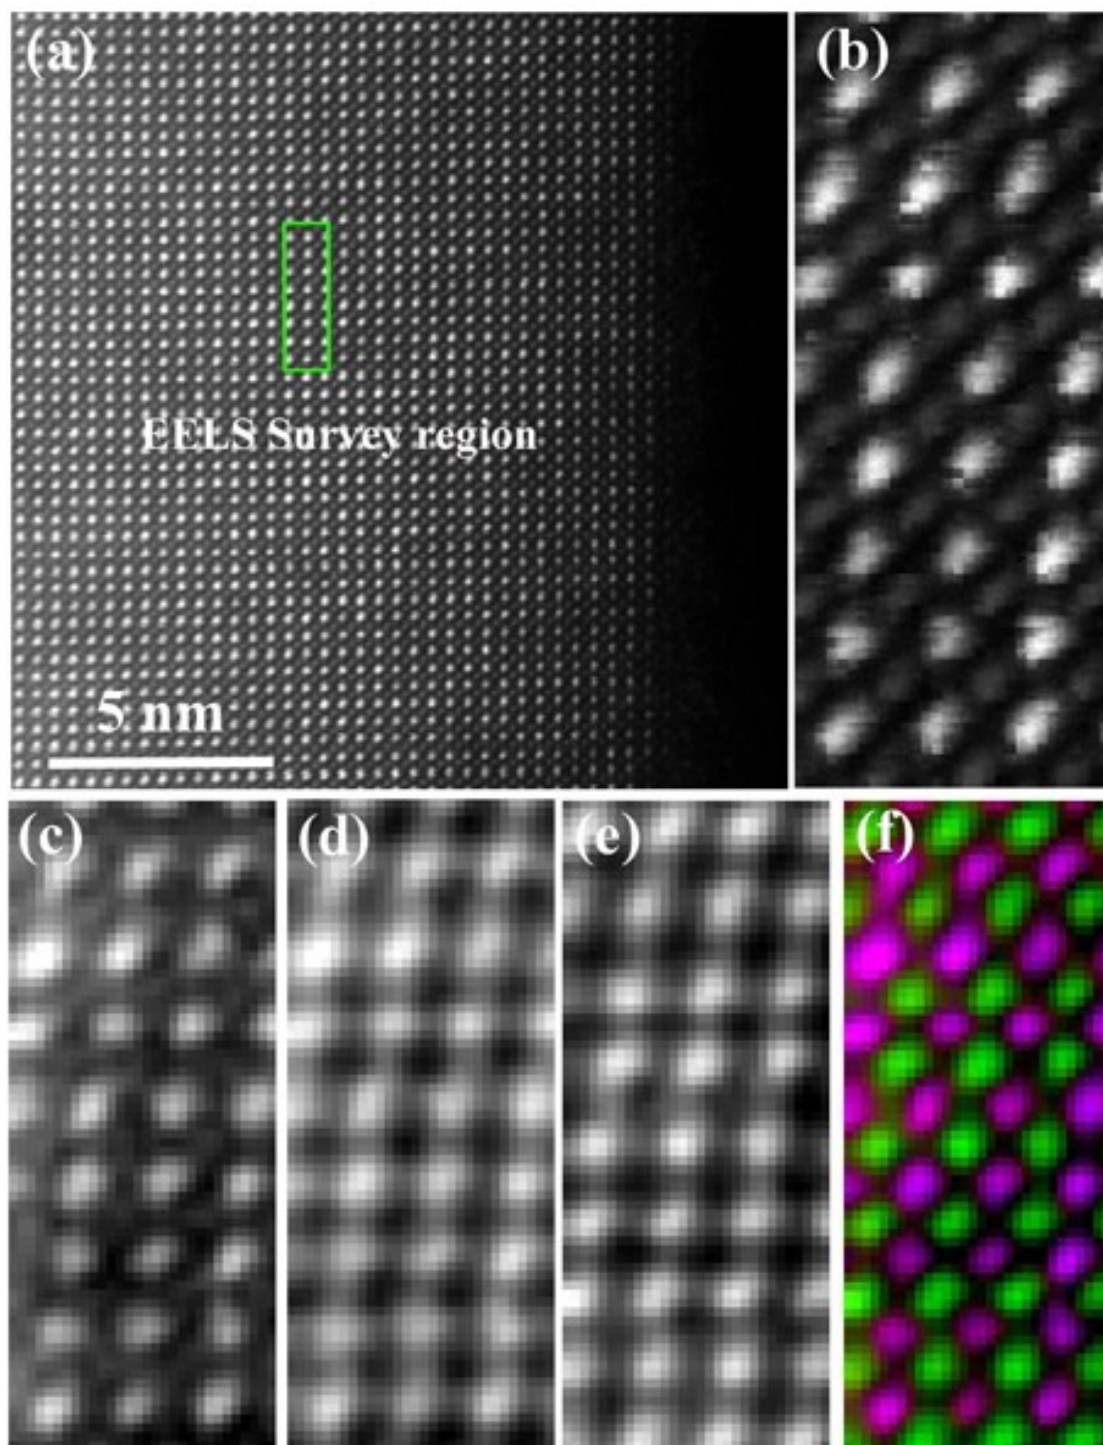

Figure S2 (a) HAADF STEM image of  $\text{Ba}_{0.80}\text{Ca}_{0.20}\text{TiO}_3$  ceramics including the survey region 3D EELS data is acquired from the region indicated by the green rectangle. (b) HAADF image of the survey region acquired simultaneously with EELS spectrum. The atomic resolution elemental maps of Ba (c), Ca (d) and Ti (e) are separately present. (f) Color map of the Ca (Red), Ti (Green) and Ba (Blue) from the survey region. The lattice distortion in STEM EELS (c-f) was induced by sample drafting during the acquirement of STEM EELS.

Table S1 Parameters for the Blochwave simulation of an STEM-EELS image of the BCTO sample using the STEM sim software.

| Parameter                               | Unit | Value  |
|-----------------------------------------|------|--------|
| Acceleration Voltage                    | kV   | 200    |
| Total specimen thickness                | nm   | 20     |
| Defocus                                 | nm   | 0      |
| Spherical aberration Cs                 | mm   | 0.0405 |
| Spherical aberration of 5th order $C_5$ | mm   | 0      |
| Zone axis                               | N/A  | [111]  |
| a-direction                             | N/A  | [010]  |
| Convergence angle                       | mrاد | 21     |
| Collection angle                        | mrاد | 94     |
| FWHM of the source image                | Å    | 0.7    |

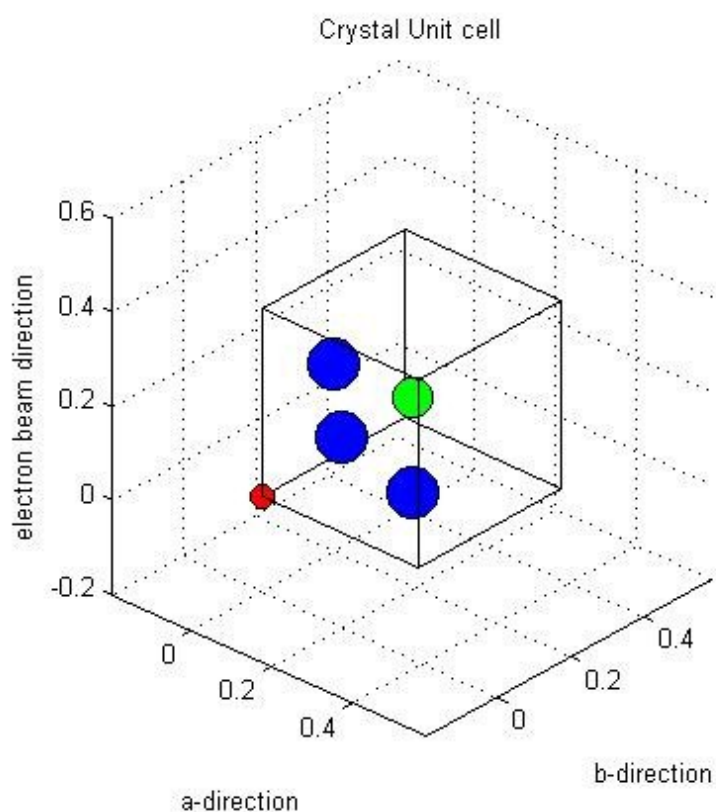

Figure S3 The input structure for the STEM simulation. A-direction: [010]. Axis unit: nm.

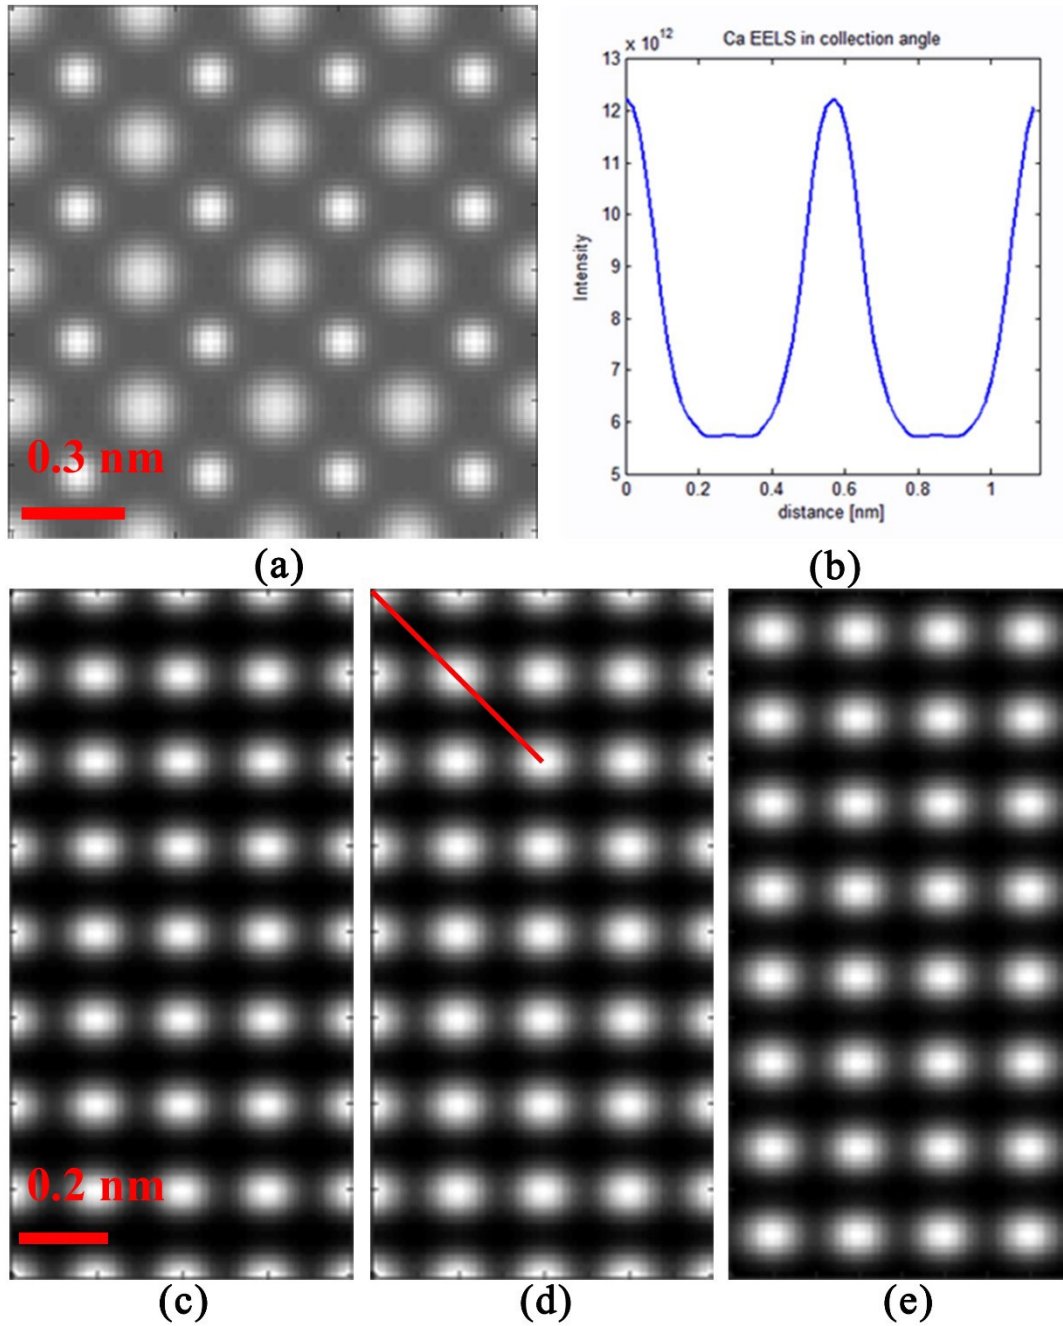

Figure S4 Simulated results for  $\text{Ba}_{0.80}\text{Ca}_{0.20}\text{TiO}_3$  sample of (a) Atomic resolution HAADF STEM image viewed along  $[100]$  zone axis of BCTO. A-axis,  $[010]$ . (b) Intensity profile of the simulated EELS spectrum image of Ca along the indicated line in (d). Simulated STEM EELS image of (c) Ba (d) Ca (e) Ti with Gaussian Peak Filter of  $0.07 \text{ nm}$ .
